# Supplementary material for: The Role of MreB, MreC and MreD in the Morphology of the Diazotrophic Filament of Anabaena sp. PCC 7120
Source: MDPI journal article supplement (doi:10.3390/life12091437), 2022-09-15
Supplement: s1 [file s1]

**Table S1.** Cyanobacterial strains, plasmids and oligonucleotides used in this work

| Strain                       | Genotype                                             | Resistance | Source                     |
|------------------------------|------------------------------------------------------|------------|----------------------------|
| <i>Anabaena</i> sp. PCC 7120 | WT                                                   |            | Pasteur Culture Collection |
| CSCV1                        | <i>mreB</i> ::C.K1                                   | Nm         | 36                         |
| CSCV2                        | <i>mreD</i> ::C.S3                                   | Sm, Sp     | 36                         |
| CSCV4                        | <i>mreC</i> ::C.K1                                   | Nm         | 36                         |
| CSCV6                        | <i>thrS2</i> ::P <sub>mreB</sub> -sfgfp- <i>mreB</i> | Sm, Sp     | 10                         |
| CSCV7                        | <i>thrS2</i> ::P <sub>mreB</sub> -sfgfp- <i>mreC</i> | Sm, Sp     | 10                         |
| CSCV8                        | <i>thrS2</i> ::P <sub>mreB</sub> -sfgfp- <i>mreD</i> | Sm, Sp     | 10                         |
| CSSC19                       | P <sub>ftsZ</sub> -ftsZ-gfpmut2                      | Sm, Sp     | 37                         |
| CSCV20                       | P <sub>ftsZ</sub> -ftsZ-gfpmut2, <i>mreB</i>         | Nm, Sm, Sp | 10                         |
| CSCV21                       | P <sub>ftsZ</sub> -ftsZ-gfpmut2, <i>mreC</i>         | Nm, Sm, Sp | 10                         |
| CSCV22                       | P <sub>ftsZ</sub> -ftsZ-gfpmut2, <i>mreD</i>         | Nm, Sm, Sp | 10                         |
| CSAV39                       | P <sub>zipN</sub> -sfgfp- <i>zipN</i>                | Sm, Sp     | 39                         |
| CSCV14                       | P <sub>zipN</sub> -sfgfp- <i>zipN</i> , <i>mreB</i>  | Nm, Sm, Sp | 10                         |
| CSCV15                       | P <sub>zipN</sub> -sfgfp- <i>zipN</i> , <i>mreC</i>  | Nm, Sm, Sp | 10                         |
| CSCV16                       | P <sub>zipN</sub> -sfgfp- <i>zipN</i> , <i>mreD</i>  | Nm, Sm, Sp | 10                         |
| CSS89                        | <i>sepJ</i> -gfpmut2                                 | Nm         | 38                         |
| CSCV17                       | <i>sepJ</i> -gfpmut2, <i>mreB</i>                    | Nm, Sm, Sp | This study                 |
| CSCV18                       | <i>sepJ</i> -gfpmut2, <i>mreC</i>                    | Nm, Sm, Sp | This study                 |
| CSCV19                       | <i>sepJ</i> -gfpmut2, <i>mreD</i>                    | Nm, Sm, Sp | This study                 |

| Plasmid | Description                          | Resistance marker | Source     |
|---------|--------------------------------------|-------------------|------------|
| pCSCV38 | pCSV3 carrying <i>sepJ</i> -gfpmut2  | Sm, Sp            | This study |
| pCSV22  | pRL424 carrying <i>sepJ</i> -gfpmut2 | Nm                | 23         |

| Oligodeoxynucleotide primers <sup>1</sup> | Sequence (5'-3')                  |
|-------------------------------------------|-----------------------------------|
| alr2338-BamHI                             | CGTGGGATCCTTTTCTGTGGTGAGGTGC      |
| gfp-BamHI                                 | AAGCGGATCCTTATTGTATAGTTCATCCATGCC |

<sup>1</sup>The underlined letters indicate a restriction site.
